# Supplementary material for: Nanometer-scale separation of d10Zn2+-layers and twin–shift competition in Ba8ZnNb6O24-based 8-layered hexagonal perovskites
Source: Royal Society of Chemistry journal article supplement (doi:10.1039/c5dt00859j), 2015-01-01
Supplement: c5dt00859j2.pdf [file c5dt00859j2.pdf]

## Supporting information for

# Nanometer-Scale Separation of $d^{10}$ $Zn^{2+}$ -Layers and Twin-Shift Competition in $Ba_8ZnNb_6O_{24}$ -Based 8-Layer Hexagonal Perovskites

Fengqi Lu,<sup>1</sup> Xiaoming Wang,<sup>2</sup> Zhengwei Pan,<sup>3</sup> Fengjuan Pan,<sup>3</sup> Shiqiang Chai,<sup>3</sup> Chaolun Liang,<sup>4</sup>

Quanchao Wang,<sup>1</sup> Jing Wang,<sup>3</sup> Liang Fang,<sup>1</sup> Xiaojun Kuang<sup>1,3,\*</sup>, Xiping Jing<sup>2,\*</sup>

1. *Guangxi Ministry-Province Jointly-Constructed Cultivation Base for State Key Laboratory of Processing for Nonferrous Metal and Featured Materials, Guangxi Universities Key Laboratory of Non-ferrous Metal Oxide Electronic Functional Materials and Devices, College of Materials Science and Engineering, Guilin University of Technology, Guilin 541004 P. R. China*
2. *Beijing National Laboratory for Molecular Sciences, The State Key Laboratory of Rare Earth Materials Chemistry and Applications, College of Chemistry and Molecular Engineering, Peking University, Beijing 100871, P. R. China*
3. *MOE Key Laboratory of Bioinorganic and Synthetic Chemistry, State Key Laboratory of Optoelectronic Materials and Technologies, School of Chemistry and Chemical Engineering, Sun Yat-Sen University, Guangzhou 510275, P. R. China*
4. *Instrumental Analysis and Research Center, Sun Yat-Sen University, Guangzhou 510275, P. R. China*

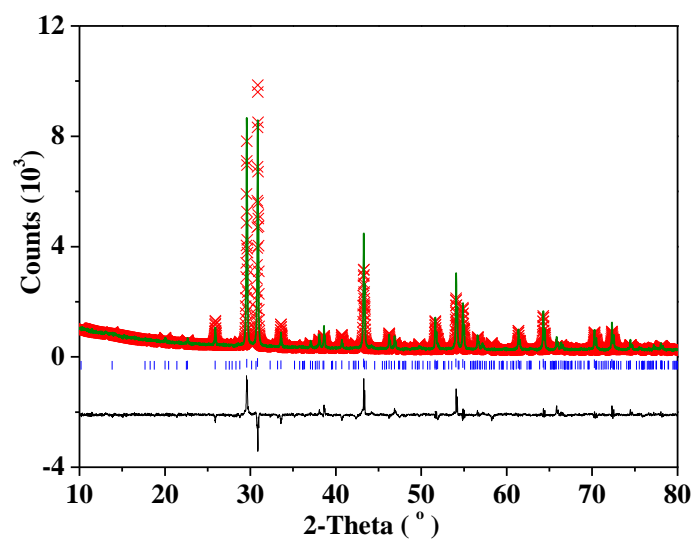

**Figure S1.** Rietveld refinement plot of XRD data for  $\text{Ba}_8\text{ZnNb}_6\text{O}_{24}$  based on the twinned structure.

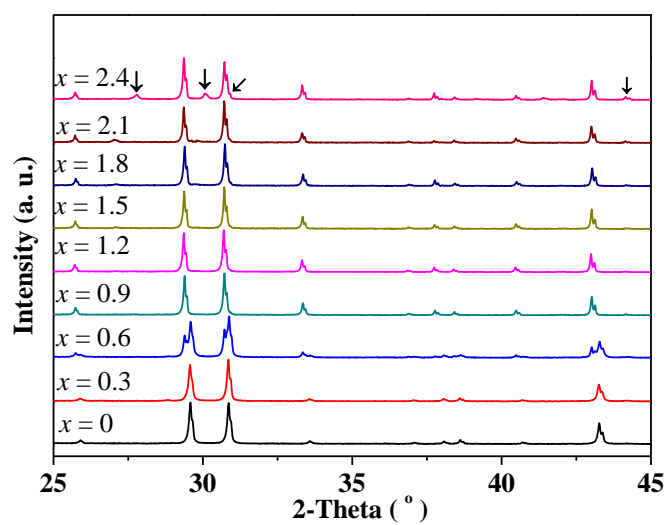

**Figure S2.** XRD patterns of  $\text{Ba}_8\text{ZnNb}_{6-x}\text{Sb}_x\text{O}_{24}$  ( $x = 0, 0.3, 0.6, 0.9, 1.2, 1.5, 1.8, 2.1, 2.4$ ). The arrows denote the reflections from the impurities.

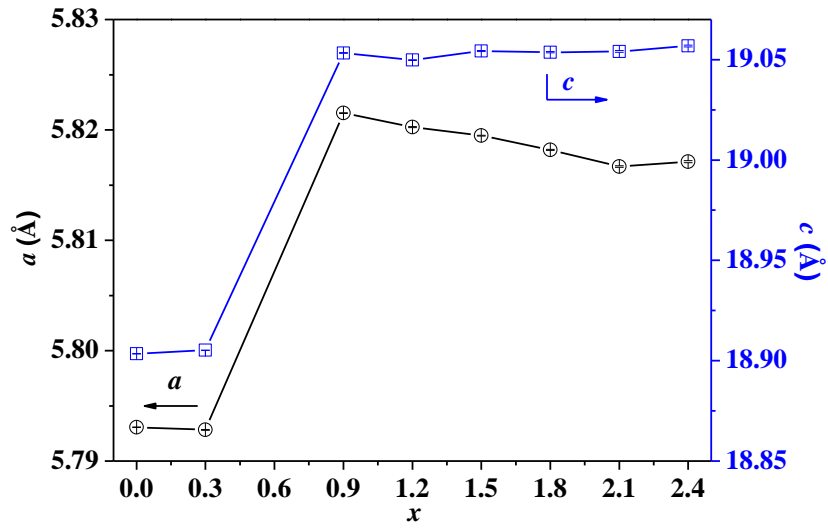

**Figure S3.** Refined cell parameters  $a$  and  $c$  of  $\text{Ba}_8\text{ZnNb}_{6-x}\text{Sb}_x\text{O}_{24}$  ( $x = 0, 0.3, 0.9, 1.2, 1.5, 1.8, 2.1, 2.4$ ) based on the unit cell of shifted  $\text{Ba}_8\text{ZnNb}_6\text{O}_{24}$  structure.

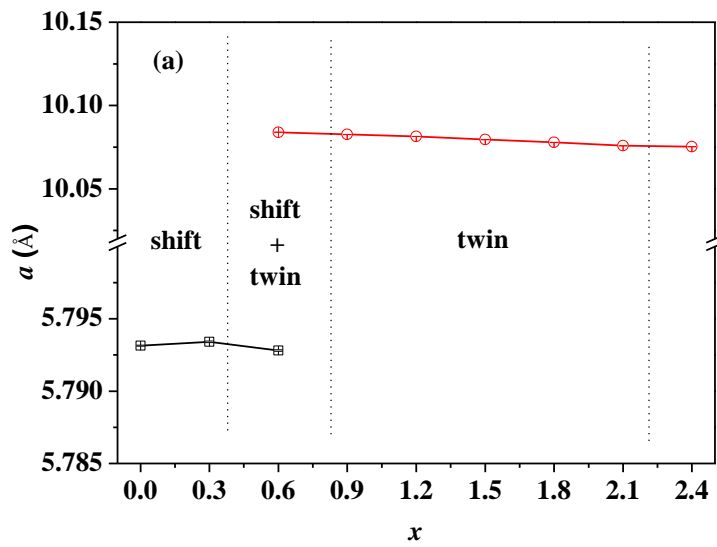

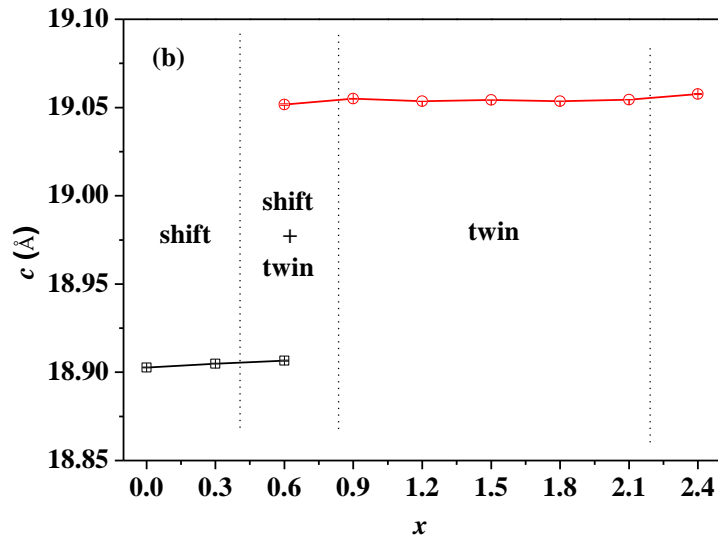

**Figure S4.** Refined cell parameters  $a$  (a) and  $c$  (b) of the twined and shifted phases in  $\text{Ba}_8\text{ZnNb}_{6-x}\text{Sb}_x\text{O}_{24}$  ( $x = 0, 0.3, 0.9, 1.2, 1.5, 1.8, 2.1, 2.4$ ).

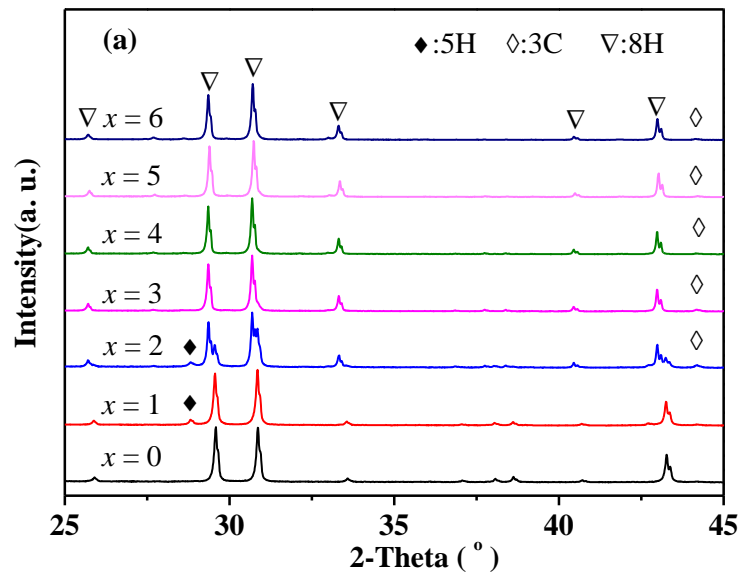

**Figure S5.** XRD patterns of  $\text{Ba}_8\text{ZnNb}_{6-x}\text{Ta}_x\text{O}_{24}$  ( $x = 0, 1, 2, 3, 4, 5, 6$ ) in 2Theta range 25-45°.

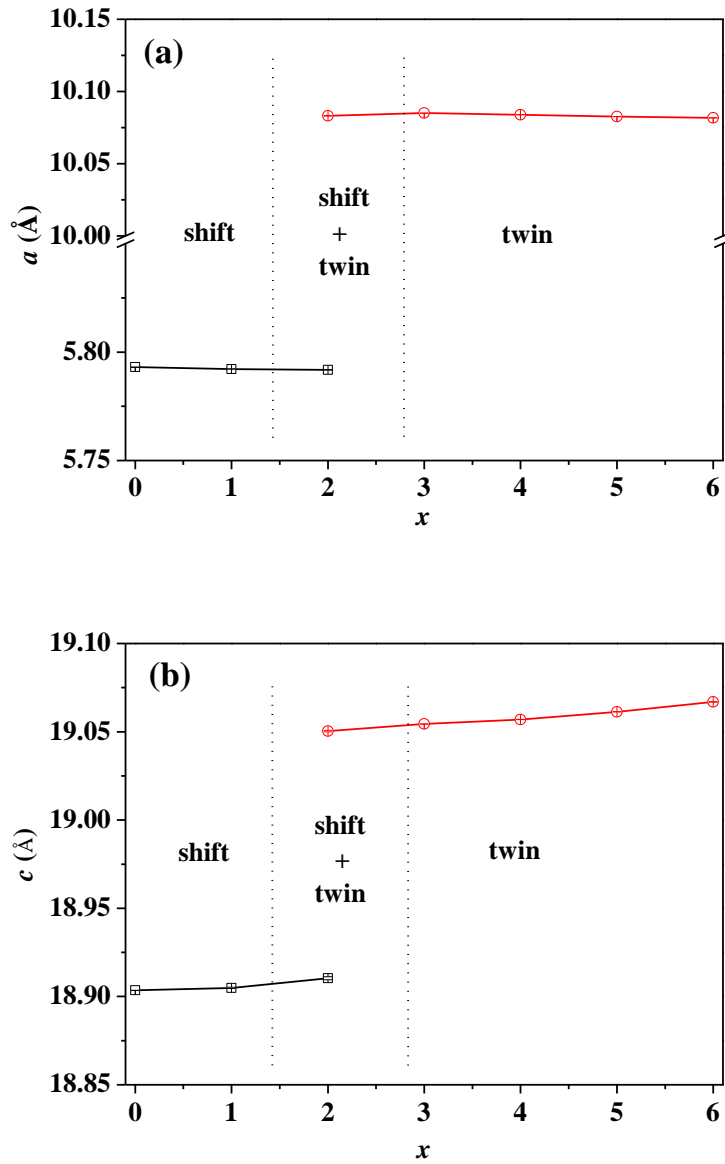

**Figure S6.** Refined cell parameters  $a$  (a) and  $c$  (b) of the twinned and shifted phases in  $\text{Ba}_8\text{ZnNb}_{6-x}\text{Ta}_x\text{O}_{24}$  ( $x = 0, 1, 2, 3, 4, 5$  and  $6$ ).

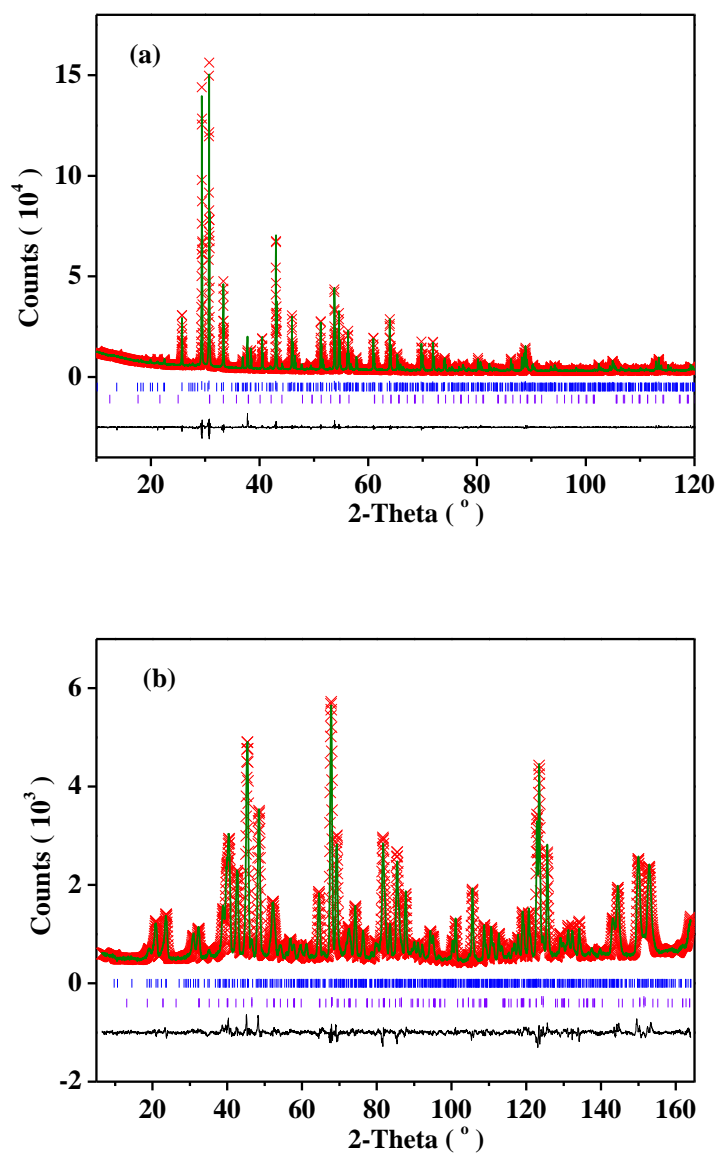

**Figure S7.** Rietveld plots of XRD (a) and NPD (b) data for the twinned  $\text{Ba}_8\text{ZnNb}_{5.1}\text{Sb}_{0.9}\text{O}_{24}$ . Vertical tick marks from top to bottom represent Bragg reflection positions of  $\text{Ba}_8\text{ZnNb}_{5.1}\text{Sb}_{0.9}\text{O}_{24}$  and  $\text{Ba}_3\text{ZnNb}_2\text{O}_9$ , and their refined weight percentages are 97.49(7) wt% and 2.51(7) wt%, respectively.

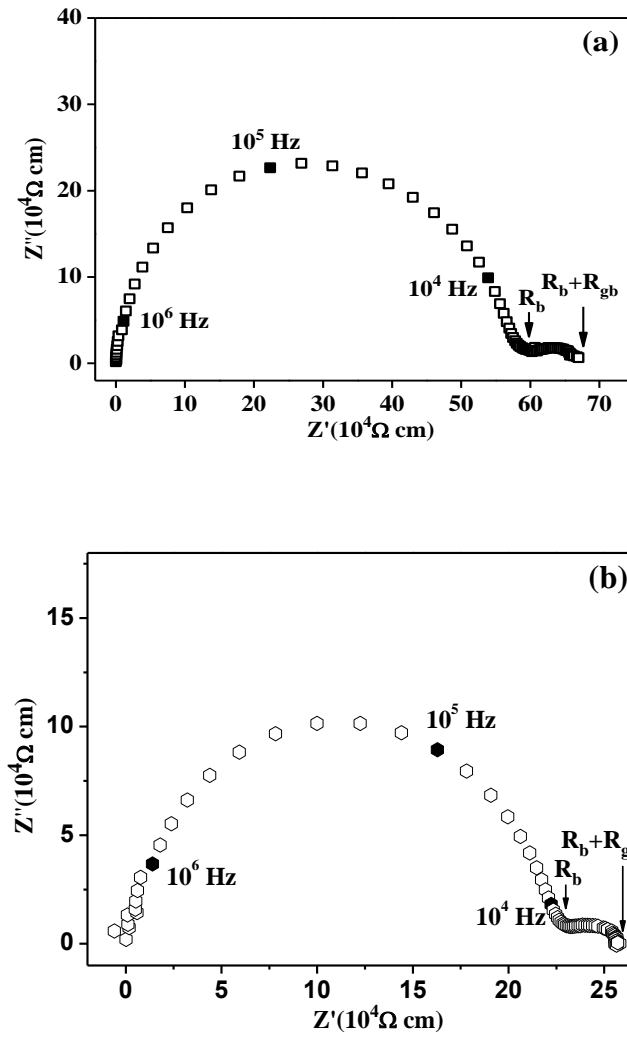

**Figure S8.** Complex impedance plot of Ba<sub>8</sub>ZnNb<sub>6</sub>O<sub>24</sub> (a) and Ba<sub>8</sub>ZnNb<sub>5.1</sub>Sb<sub>0.9</sub>O<sub>24</sub> (b) pellets at 800 °C. R<sub>b</sub> and R<sub>gb</sub> denote bulk and grain boundary resistivity, respectively. The selected frequencies were marked by the filled symbols.

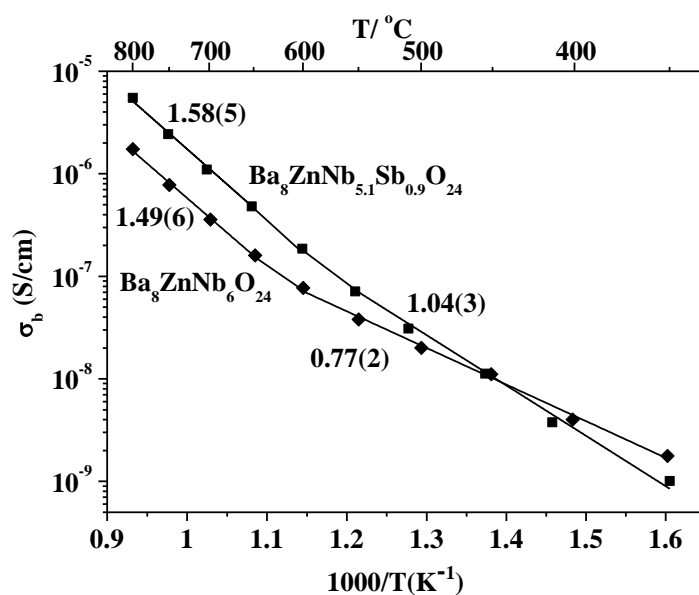

**Figure S9.** Arrhenius plots of bulk conductivity of the  $\text{Ba}_8\text{ZnNb}_6\text{O}_{24}$  and  $\text{Ba}_8\text{ZnNb}_{5.1}\text{Sb}_{0.9}\text{O}_{24}$  pellets.

The activation energies (eV) are marked in the low and high temperature regions for each pellet.

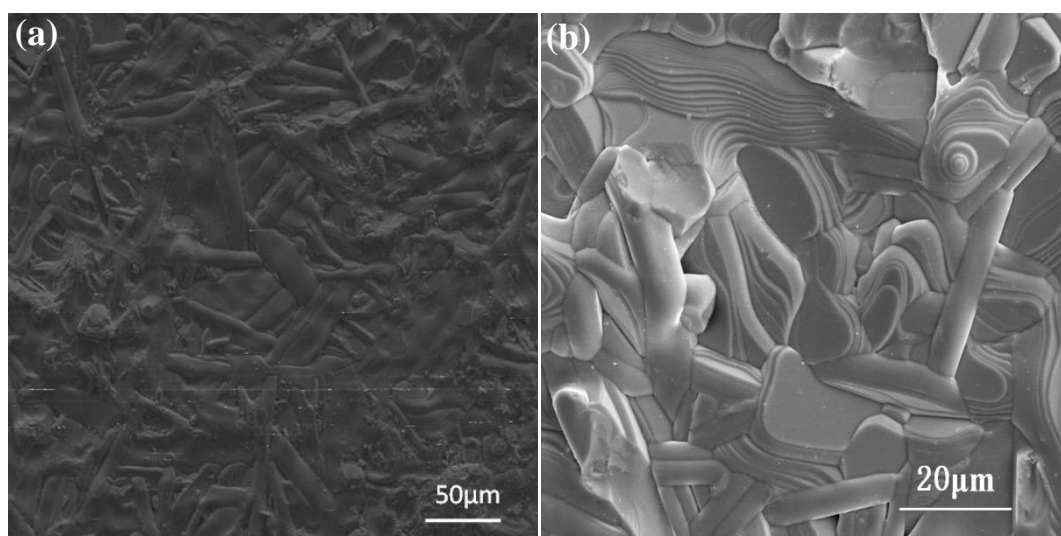

**Figure S10.** SEM images of the  $\text{Ba}_8\text{ZnNb}_6\text{O}_{24}$  (a) and  $\text{Ba}_8\text{ZnNb}_{5.1}\text{Sb}_{0.9}\text{O}_{24}$  (b) pellets.



**Table S1.** Interatomic distances, octahedral distortion parameters ( $\Delta d^*$ ) and B-O-B angles for twinned  $\text{Ba}_8\text{ZnNb}_{5.1}\text{Sb}_{0.9}\text{O}_{24}$ .

| Bond                 | Length(Å) | Bond                                  | Length (Å)/Angles (°) |
|----------------------|-----------|---------------------------------------|-----------------------|
| Ba1-O2( $\times 3$ ) | 2.734(6)  | Zn1-O4( $\times 3$ )                  | 2.157(4)              |
| Ba1-O5( $\times 6$ ) | 2.917(7)  | Zn1-O8( $\times 3$ )                  | 2.151(2)              |
| Ba1-O7( $\times 3$ ) | 3.142(2)  | $\Delta d_{\text{Zn1}} (10^{-6})$     | 1.9                   |
| Ba2-O8( $\times 3$ ) | 2.890(1)  | Nb2/Sb2-O4( $\times 3$ )              | 1.878(4)              |
| Ba2-O1( $\times 3$ ) | 2.9108(4) | Nb2/Sb2-O6( $\times 3$ )              | 2.214(3)              |
| Ba2-O6( $\times 3$ ) | 2.763(2)  | $\Delta d_{\text{Nb2/Sb2}} (10^{-3})$ | 6.7                   |
| Ba2-O5( $\times 3$ ) | 2.907(6)  | Nb3/Sb3-O3( $\times 3$ )              | 1.955(4)              |
| Ba3-O6( $\times 2$ ) | 2.861(4)  | Nb3/Sb3-O7( $\times 3$ )              | 2.184(2)              |
| Ba3-O4( $\times 2$ ) | 2.636(1)  | $\Delta d_{\text{Nb3/Sb3}} (10^{-3})$ | 3.1                   |
| Ba3-O5( $\times 2$ ) | 3.033(1)  | Nb4 -O7( $\times 1$ )                 | 1.940(3)              |
| Ba3-O7( $\times 2$ ) | 2.952(7)  | Nb4-O6( $\times 2$ )                  | 1.927(3)              |
| Ba3-O1( $\times 1$ ) | 3.039(4)  | Nb4-O5( $\times 2$ )                  | 2.073(2)              |
| Ba3-O6( $\times 2$ ) | 2.972(2)  | Nb4-O1( $\times 1$ )                  | 2.060(7)              |
| Ba3-O3( $\times 1$ ) | 2.804(3)  | $\Delta d_{\text{Nb4}} (10^{-3})$     | 1.2                   |
| Ba4-O3( $\times 1$ ) | 2.798(3)  | Nb5-O8( $\times 2$ )                  | 1.978(1)              |
| Ba4-O2( $\times 2$ ) | 2.835(2)  | Nb5-O1( $\times 1$ )                  | 2.015(7)              |
| Ba4-O8( $\times 2$ ) | 2.799(8)  | Nb5-O5( $\times 2$ )                  | 2.066(1)              |
| Ba4-O4( $\times 2$ ) | 2.956(1)  | Nb5-O2( $\times 1$ )                  | 1.966(8)              |
| Ba4-O8( $\times 2$ ) | 3.159(9)  | $\Delta d_{\text{Nb5}} (10^{-4})$     | 4.2                   |
| Ba4-O5( $\times 2$ ) | 3.111(1)  | Nb6/Sb6-O2( $\times 3$ )              | 1.884(8)              |
| Ba4-O1( $\times 1$ ) | 3.169(4)  | Nb6/Sb6-O3( $\times 3$ )              | 2.351(7)              |
| Ba5-O7( $\times 1$ ) | 2.776(3)  | $\Delta d_{\text{Nb6/Sb6}} (10^{-2})$ | 1.2                   |
| Ba5-O4( $\times 2$ ) | 2.893(5)  | Zn1-O4-Nb2/Sb2                        | 70.29(6)              |
| Ba5-O6( $\times 2$ ) | 3.073(1)  | Zn1-O8-Nb5/Sb5                        | 172.57(5)             |
| Ba5-O3( $\times 2$ ) | 2.920(8)  | Nb3-O3-Nb6/Sb6                        | 85.10(6)              |
| Ba5-O2( $\times 1$ ) | 3.024(6)  | Nb2/Sb2-O6-Nb4                        | 170.47(6)             |
| Ba5-O8( $\times 2$ ) | 2.943(1)  | Nb3-O7-Nb4                            | 171.03(7)             |
| Ba5-O4( $\times 2$ ) | 2.940(3)  | Nb4-O1-Nb5                            | 178.48(8)             |
|                      |           | Nb4-O5-Nb5/Sb5                        | 178.23(5)             |
|                      |           | Nb5/Sb5-O2-Nb6/Sb6                    | 174.53(9)             |

**Table S2.** Twin-shift option, average B-cationic sizes ( $\langle R_B \rangle$ ), and the tolerance factors ( $t$ ) of theB-site deficient 8-layer hexagonal perovskites  $Ba_8B_7O_{24}$ .

| Composition                               | $\langle R_B \rangle / \text{\AA}$ | $t$    | Structure type | Ref.      |
|-------------------------------------------|------------------------------------|--------|----------------|-----------|
| $Ba_8ZnNb_6O_{24}$                        | 0.654                              | 1.0362 | Shifted        | This work |
| $Ba_8ZnNb_{5.7}Sb_{0.3}O_{24}$            | 0.653                              | 1.0371 | Shifted        | This work |
| $Ba_8ZnNb_{5.4}Sb_{0.6}O_{24}$            | 0.651                              | 1.0380 | Mixed          | This work |
| $Ba_8ZnNb_{5.1}Sb_{0.9}O_{24}$            | 0.649                              | 1.0388 | Twinned        | This work |
| $Ba_8ZnNb_5TaO_{24}$                      | 0.654                              | 1.0362 | Shifted        | This work |
| $Ba_8ZnNb_4Ta_2O_{24}$                    | 0.654                              | 1.0362 | Mixed          | This work |
| $Ba_8ZnNb_3Ta_3O_{24}$                    | 0.654                              | 1.0362 | Twinned        | This work |
| $Ba_8ZnTa_6O_{24}$                        | 0.654                              | 1.0362 | Twinned        | 1, 2      |
| $Ba_8Ti_3Nb_4O_{24}$                      | 0.625                              | 1.0511 | Twinned        | 3         |
| $Ba_8Ti_{2.75}Nb_{4.125}Lu_{0.125}O_{24}$ | 0.630                              | 1.0484 | Twinned        | 4         |
| $Ba_8Ti_{2.5}Nb_{4.25}Lu_{0.25}O_{24}$    | 0.635                              | 1.0457 | Mixed          | 4         |
| $Ba_8Ti_2Nb_{4.5}Lu_{0.5}O_{24}$          | 0.646                              | 1.0404 | Shifted        | 4         |
| $Ba_8Ti_2Nb_{4.5}Yb_{0.5}O_{24}$          | 0.646                              | 1.0403 | shifted        | 5         |
| $Ba_8Ti_3Ta_4O_{24}$                      | 0.625                              | 1.0511 | twinned        | 6         |
| $Ba_8CoTa_6O_{24}$                        | 0.641                              | 1.0427 | Twinned        | 7         |
| $Ba_8CoNb_6O_{24}$                        | 0.641                              | 1.0427 | Shifted        | 8         |
| $Ba_8NiTa_6O_{24}$                        | 0.647                              | 1.0398 | Twinned        | 9         |

## References:

1. Moussa, S. M.; Claridge, J. B.; Rosseinsky, M. J.; Clarke, S.; Ibberson, R. M.; Price, T.; Iddles, D. M.; Sinclair, D. C., *Appl. Phys. Lett.* **2003**, 82, 4537-4539.
2. Thirumal, M.; Davies, P. K., *J. Am. Ceram. Soc.* **2005**, 88, 2126-2128.
3. Teneze, N.; Boullay, P.; Petricek, V.; Trolliard, G.; Mercurio, D., *Solid State Sci.* **2002**, 4, 1129-1136.
4. Trolliard, G.; Teneze, N.; Boullay, P.; Mercurio, D., *J. Solid State Chem.* **2004**, 177, 1188-1196.
5. B. Mössner; Kemmler-Sack, S., *J. Less-Common Met.* **1986**, 120, 203-211.
6. Shpanchenko, R. V.; Nistor, L.; Vantendeloo, G.; Vanlanduyt, J.; Amelinckx, S.; Abakumov, A. M.; Antipov, E. V.; Kovba, L. M., *J. Solid State Chem.* **1995**, 114, 560-574.
7. Kan, A.; Ogawa, H.; Yokoi, A.; Ohsato, H., *Jpn. J. Appl. Phys.* **2006**, 45, 7494-7498.
8. Mallinson, P. M.; Allix, M. M. B.; Claridge, J. B.; Ibberson, R. M.; Iddles, D. M.; Price, T.; Rosseinsky, M. J., *Angew. Chem. Int. Ed.* **2005**, 44, 7733-7736.
9. Abakumov, A. M.; Tendeloo, G. V.; Scheglov, A. A.; Shpanchenko, R. V.; Antipov, E. V., *J. Solid State Chem.* **1996**, 125, 102-107.
